# Supplementary material
Source: PubMed Central journal article supplement (PMC3536095)
Supplement: AEM.02600-12_zam999103976so1.pdf [file AEM.02600-12_zam999103976so1.pdf]

Supplementary Information

**Carboxyethylarginine synthase genes show complex cross regulation in *Streptomyces clavuligerus***

**Thomas Kwong<sup>a</sup>, Kapil Tahlan<sup>b</sup>, Cecilia L. Anders and Susan E. Jensen<sup>#</sup>**

Department of Biological Sciences, University of Alberta, Edmonton, Alberta T6G 2E9  
Canada

<sup>a</sup>Current address: Department of Chemistry, The Scripps Research Institute Florida, 130  
Scripps Way, Jupiter, FL 33458

<sup>b</sup>Current address: Department of Biology, Memorial University of Newfoundland, St.  
John's, NL, Canada A1B 3X9

<sup>#</sup>For correspondence. E-mail [susan.jensen@ualberta.ca](mailto:susan.jensen@ualberta.ca)

Table S1. Oligonucleotide primers used in this study.

| Primer             | Sequence (5'-3')                                                | Use                                                                                                                    |
|--------------------|-----------------------------------------------------------------|------------------------------------------------------------------------------------------------------------------------|
| ceaS2-Redirect For | ACGGAGCCTGGTACTGACGGAGTCTGGAGACCGCT<br>CATGATTCCGGGGATCCGTCGACC | Forward primer for <i>ceaS2</i> REDIRECT mutagenesis                                                                   |
| ceaS2-Redirect Rev | ACCCGAAGGCAGCCGGAAGAACCGGTGCCCCATGA<br>TCATGTAGGCTGGAGCTGCTTC   | Reverse primer for <i>ceaS2</i> REDIRECT mutagenesis                                                                   |
| Mutate ceaS2-For   | CAGCGGCCCGTTCCCACCCCTTG                                         | Forward primer to amplify E57W- <i>ceaS2</i> fragment                                                                  |
| Mutate ceaS2-Rev   | <u>ACCCGCGGTGAACC</u> <b><i>AGTGGCGGGTCAGAACGAAG</i></b><br>TC  | Reverse primer to amplify E57W- <i>ceaS2</i> fragment; SacII site is underlined; mutagenic bases shown in bold italics |
| ceaS1-exp For      | TATTAATCATATGGCCACCACGACCGCGAAAG                                | Forward primer for <i>ceaS1</i> expression                                                                             |
| ceaS1-exp-Rev      | ATTAATGGATCCGGGGCCGGGCATGGTGAAGTC                               | Reverse primer for <i>ceaS1</i> expression                                                                             |
| ceaS2-RT-for       | AGGCCGCGTCGATTCTCTTC                                            | Forward primer for <i>ceaS2</i> RT-PCR                                                                                 |
| ceaS2-RT-rev       | CGGCGGGTTGGGGACGGT                                              | Reverse primer for <i>ceaS2</i> RT-PCR                                                                                 |
| bls1 forward       | TCCTGAACGGACGGTTCGC                                             | Forward primer for <i>bls1</i> RT-PCR                                                                                  |
| bls1 reverse       | AGGGCAGTTCCTGACGAGTT                                            | Reverse primer for <i>bls1</i> RT-PCR                                                                                  |

|                     |                           |                                          |
|---------------------|---------------------------|------------------------------------------|
| CAN169              | CGGCTGCTGGAACGCTATGACCT   | Forward primer<br>for <i>bls2</i> RT-PCR |
| CAN170              | CCGCCGGAGAGCACCACCAA      | Reverse primer<br>for <i>bls2</i> RT-PCR |
| hrdB RT-<br>forward | ATTCCGCCAACCCAGTGGAAGAATG | Forward primer<br>for <i>hrdB</i> RT-PCR |
| hrdB RT-<br>reverse | TCCTTCTTGGACGCGGTCTTCTTG  | Reverse primer<br>for <i>hrdB</i> RT-PCR |
